# Supplementary material for: Does digital health technology improve physicians’ job satisfaction and work–life balance? A cross-sectional national survey and regression analysis using an instrumental variable
Source: PubMed Central journal article supplement — BMJ Open. 2020 Dec 12;10(12):e041690. doi: 10.1136/bmjopen-2020-041690 (PMC7735090; doi:10.1136/bmjopen-2020-041690), 2020-12-12
Supplement: bmjopen-2020-041690supp001.pdf [file bmjopen-2020-041690supp001.pdf]

## Appendix: Regressions

Table A.1: Estimated effects on the use of digital health technology

|                                                                                                                                                            | Average marginal effect on the probability of using digital health technology<br>probit (95% CI) |
|------------------------------------------------------------------------------------------------------------------------------------------------------------|--------------------------------------------------------------------------------------------------|
| Colleagues and support staff already extensively use digital health technology                                                                             | 0.041<br>(0.026,0.056)                                                                           |
| Digital health technology improves care processes (e.g. improve care coordination, continuity of care and reduce duplication)                              | 0.038<br>(0.027,0.050)                                                                           |
| I have no concerns about data privacy or security                                                                                                          | 0.005<br>(0.001,0.010)                                                                           |
| I receive support and advice on IT security from my main place of work (e.g., on password protection/ encryption, staff training, firewalls, and back-ups) | 0.016<br>(0.010,0.023)                                                                           |
| Productivity                                                                                                                                               |                                                                                                  |
| Specialists                                                                                                                                                | -0.002<br>(-0.006,0.002)                                                                         |
| Physician in training                                                                                                                                      | -0.004<br>(-0.012,0.003)                                                                         |
| Male                                                                                                                                                       | 0.003<br>(-0.000,0.007)                                                                          |
| Age: 40-49 years                                                                                                                                           | 0.011<br>(0.005,0.018)                                                                           |
| Age: 50-59 years                                                                                                                                           | 0.007<br>(0.001,0.014)                                                                           |
| Age: +60 years                                                                                                                                             | -0.003<br>(-0.012,0.006)                                                                         |
| Live in partner                                                                                                                                            | 0.015<br>(0.005,0.026)                                                                           |
| Young child                                                                                                                                                | -0.009<br>(-0.017,-0.001)                                                                        |
| Spouse: Full time employment                                                                                                                               | 0.002<br>(-0.004,0.008)                                                                          |
| Spouse: Part time employment                                                                                                                               | 0.007<br>(0.001,0.013)                                                                           |
| Practice setting: Public only                                                                                                                              | 0.030<br>(0.018,0.042)                                                                           |
| Practice setting: Private only                                                                                                                             | 0.021<br>(0.012,0.031)                                                                           |
| Metropolitan area                                                                                                                                          | 0.002<br>(-0.003,0.007)                                                                          |
| Socio-Economic Indexes for Areas of Relative Socio-economic Advantage and Disadvantage (SEIFA-IRSAD)                                                       | -0.013<br>(-0.037,0.010)                                                                         |
| Foreign graduate                                                                                                                                           | -0.007                                                                                           |

|                                          |                 |
|------------------------------------------|-----------------|
|                                          | (-0.015,-0.000) |
| Top eight Australian university graduate | -0.005          |
|                                          | (-0.010,-0.000) |
| Fellowship of college                    | 0.000           |
|                                          | (-0.004,0.005)  |
| Personality trait: Extraversion          | -0.001          |
|                                          | (-0.004,0.001)  |
| Personality trait: Agreeableness         | -0.000          |
|                                          | (-0.002,0.002)  |
| Personality trait: Conscientiousness     | 0.001           |
|                                          | (-0.001,0.003)  |
| Personality trait: Neuroticism           | 0.002           |
|                                          | (-0.000,0.004)  |
| Personality trait: Openness              | -0.000          |
|                                          | (-0.002,0.001)  |
| State                                    | Yes             |
| Pseudo R2                                | 0.464           |
| Number of observations                   | 7,043           |

Note: This table presents the estimated average marginal change in the probability of job satisfaction, work-life balance from using digital health technology. Each estimate is from a separate probit regression model that includes a full set of covariates from Table 2. All the adjusted estimates include the state the practice is located and the physicians' personality traits. The estimates for the specialists are adjusted for their specialties. All the estimates are also adjusted for the cross-sectional survey weights. The 95% Confidence Intervals (CI), presented in the parenthesis are based on standard errors clustered at the postcode level.

Table A.2: Estimated average marginal effects of using digital health technology on the probability of high job satisfaction

| Models                                                                                 | Probit - All physicians | IV-Probit - All physicians | Probit - GPs    | Probit - Specialists | Probit - Doctors in training |
|----------------------------------------------------------------------------------------|-------------------------|----------------------------|-----------------|----------------------|------------------------------|
| Using digital health technology                                                        | 0.162                   | 0.142                      | 0.246           | 0.107                | 0.080                        |
|                                                                                        | (0.112,0.212)           | (-0.013,0.297)             | (0.180,0.313)   | (0.021,0.193)        | (-0.038,0.198)               |
| Specialists                                                                            | 0.098                   | 0.107                      |                 |                      |                              |
|                                                                                        | (0.060,0.136)           | (0.068,0.145)              |                 |                      |                              |
| Physician in training                                                                  | -0.032                  | -0.027                     |                 |                      |                              |
|                                                                                        | (-0.085,0.020)          | (-0.079,0.025)             |                 |                      |                              |
| Male                                                                                   | 0.007                   | 0.007                      | -0.024          | 0.010                | 0.040                        |
|                                                                                        | (-0.022,0.035)          | (-0.022,0.036)             | (-0.074,0.026)  | (-0.038,0.059)       | (-0.007,0.088)               |
| Age: 40-49 years                                                                       | -0.046                  | -0.042                     | 0.001           | -0.091               | -0.028                       |
|                                                                                        | (-0.088,-0.004)         | (-0.086,0.002)             | (-0.066,0.067)  | (-0.165,-0.017)      | (-0.119,0.064)               |
| Age: 50-59 years                                                                       | -0.030                  | -0.025                     | 0.020           | -0.074               | 0.109                        |
|                                                                                        | (-0.081,0.021)          | (-0.077,0.027)             | (-0.046,0.086)  | (-0.156,0.009)       | (-0.046,0.265)               |
| Age: +60 years                                                                         | 0.080                   | 0.090                      | 0.088           | 0.046                | 0.203                        |
|                                                                                        | (0.027,0.134)           | (0.036,0.144)              | (0.019,0.157)   | (-0.042,0.134)       | (-0.022,0.428)               |
| Live in partner                                                                        | 0.073                   | 0.073                      | 0.059           | 0.047                | 0.092                        |
|                                                                                        | (0.035,0.112)           | (0.033,0.113)              | (-0.006,0.125)  | (-0.017,0.111)       | (0.038,0.146)                |
| Young child                                                                            | -0.070                  | -0.069                     | -0.062          | -0.103               | -0.039                       |
|                                                                                        | (-0.111,-0.029)         | (-0.111,-0.027)            | (-0.135,0.012)  | (-0.171,-0.036)      | (-0.100,0.022)               |
| Spouse: Full-time employment                                                           | -0.024                  | -0.024                     | -0.029          | -0.024               | -0.044                       |
|                                                                                        | (-0.059,0.011)          | (-0.060,0.011)             | (-0.084,0.027)  | (-0.077,0.029)       | (-0.109,0.020)               |
| Spouse: Part-time employment                                                           | -0.055                  | -0.054                     | -0.029          | -0.064               | -0.079                       |
|                                                                                        | (-0.095,-0.015)         | (-0.094,-0.013)            | (-0.088,0.031)  | (-0.121,-0.006)      | (-0.156,-0.002)              |
| Practice setting: Public only                                                          | -0.011                  | -0.017                     | 0.065           | 0.000                | 0.102                        |
|                                                                                        | (-0.046,0.023)          | (-0.059,0.025)             | (-0.057,0.187)  | (-0.044,0.045)       | (0.026,0.178)                |
| Practice setting: Private only                                                         | 0.132                   | 0.130                      | 0.114           | 0.149                | 0.256                        |
|                                                                                        | (0.089,0.176)           | (0.083,0.176)              | (0.056,0.172)   | (0.089,0.210)        | (0.072,0.439)                |
| Metropolitan area                                                                      | -0.068                  | -0.067                     | -0.099          | -0.027               | -0.089                       |
|                                                                                        | (-0.107,-0.030)         | (-0.106,-0.028)            | (-0.151,-0.046) | (-0.093,0.040)       | (-0.165,-0.013)              |
| Socio-Economic Indexes for Areas of Relative Socio-economic Advantage and Disadvantage | 0.118                   | 0.116                      | 0.213           | 0.052                | -0.073                       |

|                                               |                 |                 |                 |                |                |
|-----------------------------------------------|-----------------|-----------------|-----------------|----------------|----------------|
| (SEIFA-IRSAD)                                 |                 |                 |                 |                |                |
|                                               | (-0.105,0.341)  | (-0.111,0.343)  | (-0.112,0.539)  | (-0.297,0.401) | (-0.428,0.282) |
| Foreign graduate                              | -0.007          | -0.012          | -0.081          | 0.038          | -0.031         |
|                                               | (-0.048,0.033)  | (-0.052,0.028)  | (-0.143,-0.019) | (-0.021,0.096) | (-0.114,0.052) |
| Top eight Australian university graduate      | 0.018           | 0.016           | -0.008          | 0.042          | -0.023         |
|                                               | (-0.021,0.057)  | (-0.023,0.055)  | (-0.065,0.048)  | (-0.014,0.098) | (-0.082,0.036) |
| Fellowship of college                         | 0.045           | 0.047           | 0.051           | 0.050          | -0.015         |
|                                               | (0.008,0.083)   | (0.010,0.084)   | (0.007,0.094)   | (-0.032,0.132) | (-0.130,0.099) |
| Personality trait: Extraversion               | 0.093           | 0.093           | 0.103           | 0.102          | 0.073          |
|                                               | (0.077,0.109)   | (0.077,0.110)   | (0.078,0.128)   | (0.079,0.125)  | (0.045,0.102)  |
| Personality trait: Agreeableness              | 0.027           | 0.025           | 0.031           | 0.026          | 0.027          |
|                                               | (0.010,0.043)   | (0.008,0.041)   | (0.006,0.055)   | (0.001,0.051)  | (0.001,0.053)  |
| Personality trait: Conscientiousness          | 0.008           | 0.008           | 0.006           | 0.011          | -0.005         |
|                                               | (-0.006,0.022)  | (-0.006,0.022)  | (-0.017,0.028)  | (-0.011,0.033) | (-0.029,0.018) |
| Personality trait: Neuroticism                | -0.000          | -0.000          | 0.009           | -0.005         | 0.005          |
|                                               | (-0.014,0.014)  | (-0.014,0.014)  | (-0.013,0.032)  | (-0.027,0.018) | (-0.018,0.027) |
| Personality trait: Openness                   | -0.016          | -0.016          | -0.019          | -0.020         | -0.017         |
|                                               | (-0.031,-0.002) | (-0.030,-0.001) | (-0.043,0.005)  | (-0.042,0.001) | (-0.039,0.005) |
| Wald statistics for exogeneity test [p-value] |                 | 23.990 [0.000]  |                 |                |                |
| State                                         | Yes             | Yes             | Yes             | Yes            | Yes            |
| Specialty                                     | No              | No              | No              | Yes            | No             |
| Pseudo R2                                     | 0.075           | 0.225           | 0.072           | 0.082          | 0.069          |
| Number of observations                        | 7,043           | 7,043           | 2,491           | 2,776          | 1,651          |

Note: This table presents the estimated average marginal change in the probability of job satisfaction, work-life balance from using digital health technology. Each estimate is from a separate probit regression model that includes a full set of covariates from Table 2. All the adjusted estimates include the state the practice is located and the physicians' personality traits. The estimates for the specialists are adjusted for their specialties. All the estimates are also adjusted for the cross-sectional survey weights. The 95% Confidence Intervals (CI), presented in the parenthesis are based on standard errors clustered at the postcode level.

Table A.3: Estimated average marginal effects of using digital health technology on the probability of work-life balance

| Models                                       | Probit - All physicians | IV-Probit - All physicians | Probit - GPs    | Probit - Specialists | Probit - Doctors in training |
|----------------------------------------------|-------------------------|----------------------------|-----------------|----------------------|------------------------------|
| Using digital health technology              | 0.232                   | 0.203                      | 0.213           | 0.176                | 0.194                        |
|                                              | (0.176,0.287)           | (0.024,0.381)              | (0.125,0.301)   | (0.086,0.267)        | (0.075,0.312)                |
| Specialists                                  | 0.122                   | 0.129                      |                 |                      |                              |
|                                              | (0.081,0.164)           | (0.088,0.171)              |                 |                      |                              |
| Physician in training                        | -0.078                  | -0.074                     |                 |                      |                              |
|                                              | (-0.136,-0.021)         | (-0.133,-0.016)            |                 |                      |                              |
| Male                                         | 0.008                   | 0.009                      | -0.053          | 0.009                | 0.047                        |
|                                              | (-0.025,0.042)          | (-0.025,0.043)             | (-0.104,-0.002) | (-0.039,0.057)       | (-0.003,0.097)               |
| Age: 40-49 years                             | -0.072                  | -0.068                     | -0.089          | -0.104               | 0.015                        |
|                                              | (-0.116,-0.028)         | (-0.112,-0.024)            | (-0.156,-0.023) | (-0.167,-0.042)      | (-0.088,0.118)               |
| Age: 50-59 years                             | -0.047                  | -0.042                     | -0.039          | -0.090               | 0.196                        |
|                                              | (-0.096,0.001)          | (-0.089,0.005)             | (-0.106,0.027)  | (-0.159,-0.021)      | (0.031,0.361)                |
| Age: +60 years                               | 0.041                   | 0.050                      | 0.048           | 0.005                | 0.166                        |
|                                              | (-0.008,0.090)          | (0.001,0.099)              | (-0.018,0.115)  | (-0.067,0.077)       | (-0.056,0.388)               |
| Live in partner                              | 0.094                   | 0.094                      | 0.037           | 0.103                | 0.045                        |
|                                              | (0.053,0.135)           | (0.047,0.140)              | (-0.028,0.102)  | (0.033,0.173)        | (-0.024,0.115)               |
| Young child                                  | -0.098                  | -0.097                     | -0.031          | -0.134               | -0.117                       |
|                                              | (-0.145,-0.051)         | (-0.148,-0.046)            | (-0.105,0.044)  | (-0.213,-0.054)      | (-0.195,-0.039)              |
| Spouse: Full-time employment                 | -0.037                  | -0.038                     | -0.028          | -0.052               | 0.000                        |
|                                              | (-0.073,-0.001)         | (-0.073,-0.002)            | (-0.084,0.028)  | (-0.107,0.003)       | (-0.070,0.070)               |
| Spouse: Part-time employment                 | -0.033                  | -0.031                     | 0.010           | -0.059               | 0.011                        |
|                                              | (-0.076,0.011)          | (-0.076,0.014)             | (-0.051,0.070)  | (-0.115,-0.003)      | (-0.119,0.142)               |
| Practice setting: Public only                | 0.087                   | 0.082                      | 0.221           | 0.078                | 0.123                        |
|                                              | (0.046,0.127)           | (0.030,0.133)              | (0.086,0.357)   | (0.026,0.131)        | (0.035,0.211)                |
| Practice setting: Private only               | 0.204                   | 0.201                      | 0.207           | 0.183                | 0.397                        |
|                                              | (0.161,0.248)           | (0.151,0.251)              | (0.147,0.268)   | (0.129,0.237)        | (0.198,0.596)                |
| Metropolitan area                            | 0.005                   | 0.006                      | 0.047           | -0.002               | -0.040                       |
|                                              | (-0.036,0.045)          | (-0.034,0.047)             | (-0.006,0.100)  | (-0.069,0.065)       | (-0.114,0.034)               |
| Socio-Economic Indexes for Areas of Relative | -0.182                  | -0.187                     | 0.029           | -0.236               | -0.222                       |

|                                                         |                 |                 |                 |                 |                 |
|---------------------------------------------------------|-----------------|-----------------|-----------------|-----------------|-----------------|
| Socio-economic Advantage and Disadvantage (SEIFA-IRSAD) |                 |                 |                 |                 |                 |
|                                                         | (-0.455,0.090)  | (-0.463,0.088)  | (-0.305,0.363)  | (-0.656,0.184)  | (-0.659,0.214)  |
| Foreign graduate                                        | 0.016           | 0.012           | -0.045          | 0.066           | 0.023           |
|                                                         | (-0.025,0.057)  | (-0.029,0.052)  | (-0.112,0.022)  | (0.010,0.123)   | (-0.080,0.126)  |
| Top eight Australian university graduate                | 0.048           | 0.046           | -0.012          | 0.079           | 0.025           |
|                                                         | (0.010,0.086)   | (0.008,0.084)   | (-0.071,0.047)  | (0.020,0.139)   | (-0.040,0.090)  |
| Fellowship of college                                   | 0.034           | 0.036           | 0.039           | 0.057           | -0.090          |
|                                                         | (-0.005,0.073)  | (-0.003,0.075)  | (-0.009,0.086)  | (-0.022,0.136)  | (-0.198,0.018)  |
| Personality trait: Extraversion                         | 0.064           | 0.064           | 0.039           | 0.069           | 0.081           |
|                                                         | (0.050,0.079)   | (0.049,0.079)   | (0.014,0.065)   | (0.048,0.090)   | (0.050,0.112)   |
| Personality trait: Agreeableness                        | 0.010           | 0.008           | -0.014          | 0.016           | 0.025           |
|                                                         | (-0.006,0.025)  | (-0.008,0.023)  | (-0.037,0.010)  | (-0.005,0.037)  | (-0.005,0.055)  |
| Personality trait: Conscientiousness                    | -0.009          | -0.010          | -0.005          | -0.007          | -0.023          |
|                                                         | (-0.025,0.006)  | (-0.025,0.006)  | (-0.026,0.017)  | (-0.028,0.014)  | (-0.053,0.007)  |
| Personality trait: Neuroticism                          | -0.011          | -0.011          | -0.005          | -0.014          | -0.007          |
|                                                         | (-0.025,0.003)  | (-0.025,0.003)  | (-0.028,0.017)  | (-0.036,0.008)  | (-0.035,0.020)  |
| Personality trait: Openness                             | -0.044          | -0.043          | -0.035          | -0.044          | -0.037          |
|                                                         | (-0.059,-0.028) | (-0.059,-0.027) | (-0.059,-0.010) | (-0.066,-0.022) | (-0.063,-0.012) |
| Wald statistics for exogeneity test [p-value]           |                 | 15.110 [0.000]  |                 |                 |                 |
| State                                                   | Yes             | Yes             | Yes             | Yes             | Yes             |
| Specialty                                               | No              | No              | No              | Yes             | No              |
| Pseudo R2                                               | 0.021           | 0.217           | 0.062           | 0.070           | 0.068           |
| Number of observations                                  | 7,043           | 7,043           | 2,491           | 2,776           | 1,651           |

Note: This table presents the estimated average marginal change in the probability of job satisfaction, work-life balance from using digital health technology. Each estimate is from a separate probit regression model that includes a full set of covariates from Table 2. All the adjusted estimates include the state the practice is located and the physicians' personality traits. The estimates for the specialists are adjusted for their specialties. All the estimates are also adjusted for the cross-sectional survey weights. The 95% Confidence Intervals (CI), presented in the parenthesis are based on standard errors clustered at the postcode level.
